# Supplementary material for: Anti-Inflammatory Activity of Fucoidan Extracts In Vitro
Source: MDPI journal article supplement (doi:10.3390/md19120702), 2021-12-11
Supplement: s1 [file s1]

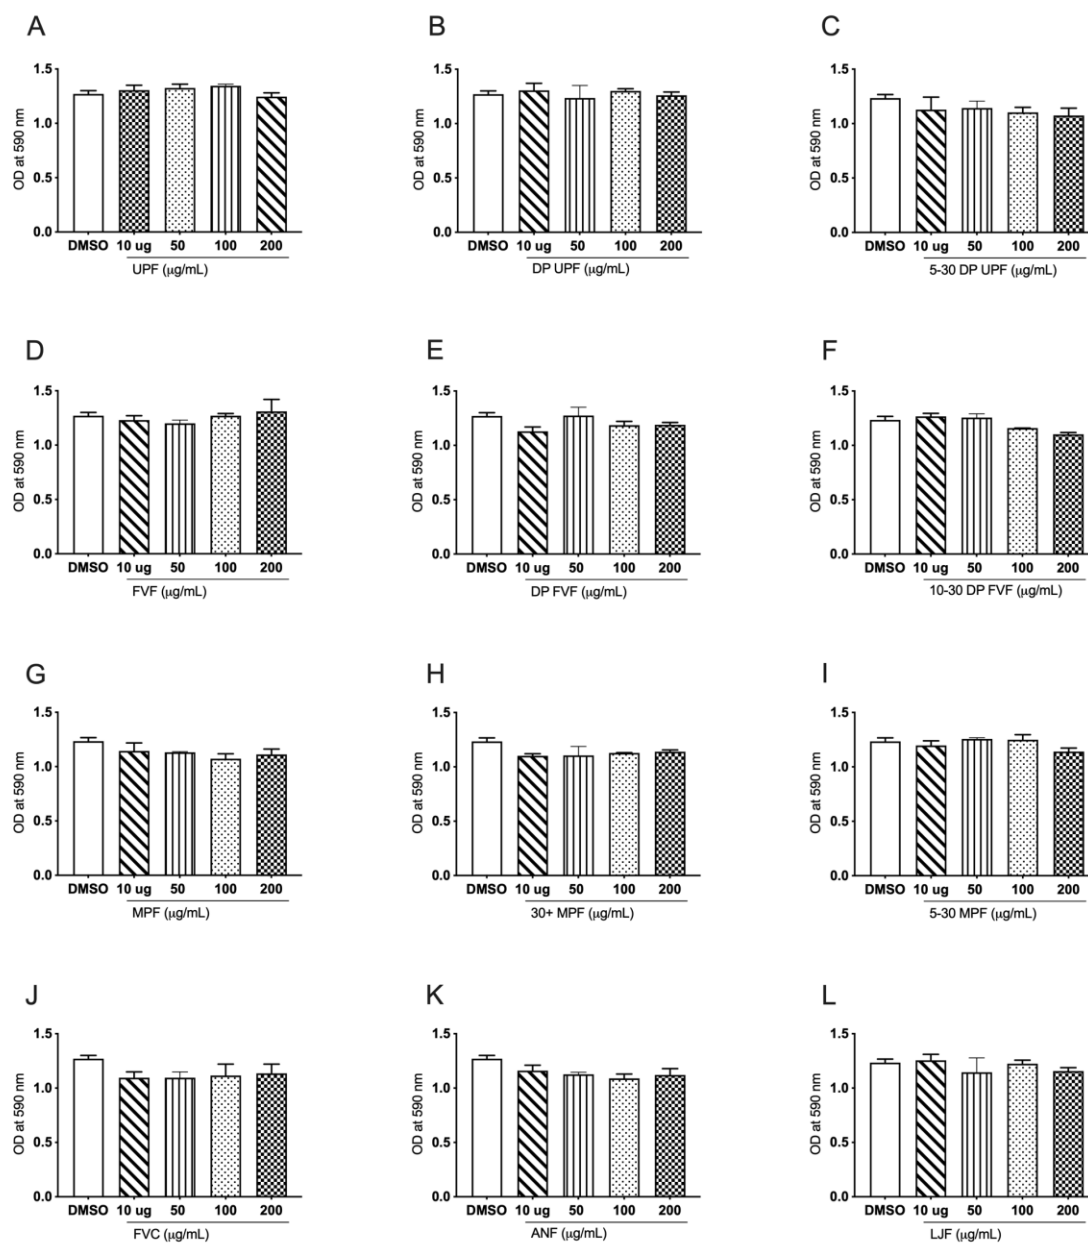

Supplementary Figure S1

Effects of fucoidan extracts on THP-1 cell viability. Cells were treated with the specified concentrations of fucoidan extract for 48 h and assessed by MTT reduction assays. Results expressed OD of treated cells vs vehicle control. Data represented as means  $\pm$  SEM. Statistical analysis were carried out using one-way ANOVA followed by Tukey's multiple comparison test. A p-value of  $<0.05$  is considered significant if applicable.
